# Supplementary material for: Aerosol-assisted chemical vapor deposition of MSe and MSSe thin films using zinc(ii) and cadmium(ii) single source precursors containing hybrid Se,X-PNC ligands
Source: Royal Society of Chemistry journal article supplement (doi:10.1039/d3nj04505f), 2023-01-01
Supplement: d3nj04505f1.pdf [file d3nj04505f1.pdf]

17.8 (d,  $^2J_{C-P} = 14.1$  Hz,  $CH_3$ - $iPr$ ), 23.5 ( $CH_2$ -piperidine), 25.3 ( $CH_2$ -piperidine), 29.3 (d,  $^1J_{C-P} = 50.2$  Hz,  $CH$ - $iPr$ ), 46.3 (N $CH_2$ -piperidine), 178.7 (CS). FTIR (KBr,  $cm^{-1}$ ):  $\nu = 3226$  v(NH), 2959, 2927, 2854 v(CH), 1487, 1443, 1297, 1123, 657 v(CN/NH/CS), 944 v(PN), 539 v(PSe). EI (m/z): 341 corresponding to  $^iPr_2P(Se)NHC(S)NC_5H_{10}$ . Microanalysis calculated for  $C_{12}H_{25}N_2SeSP$ : N = 8.26, C = 42.47, H = 7.43 %. Observed: N = 8.29, C = 42.57, H = 7.48 %.

**$^iPr_2P(Se)NHC(O)NC_5H_{10}$  (2).** Piperidine (3.95 mL, 40 mmol) and  $^iPr_2P(Se)NC(O)$  (9.52 g, 40 mmol). White solid. Yield: 10.51 g (85%). M.p. 77-79 °C.  $^{31}P\{^1H\}$  NMR ( $C_6D_6$ , 298 K, 121.65 MHz, ppm):  $\delta = 106.8$  (s) ( $^1J_{P-Se} = 751.8$  Hz).  $^{77}Se\{^1H\}$  NMR ( $C_6D_6$ , 298 K, 57.28 MHz, ppm):  $\delta = -469.4$  ( $^1J_{Se-P} = 751.8$  Hz).  $^1H$  NMR ( $C_6D_6$ , 298 K, 300 MHz, ppm):  $\delta = 1.00$  (br, 6H,  $CH_2$ -piperidine), 1.19 (2dd,  $CH_3$ - $iPr^a$   $^3J_{H-H} = 6$  Hz,  $CH_3$ - $iPr^a$   $^3J_{H-P} = 15$  Hz,  $CH_3$ - $iPr^b$   $^3J_{H-H} = 6$  Hz,  $CH_3$ - $iPr^b$   $^3J_{H-P} = 21$  Hz, 12H), 2.81 (br, 4H, N $CH_2$ -piperidine), 3.01 (dsep,  $^2J_{H-H} = 6.0$  Hz,  $^2J_{H-P} = 9$  Hz, 2H,  $CH$ - $iPr$ ), 5.11 (s, NH).  $^{13}C\{^1H\}$  NMR ( $C_6D_6$ , 298 K, 75.56 MHz, ppm):  $\delta = 17.6$  (d,  $^2J_{C-P} = 16.05$  Hz,  $CH_3$ - $iPr$ ), 24.2 ( $CH_2$ -piperidine), 24.1 ( $CH_2$ -piperidine), 25.8 ( $CH_2$ -piperidine), 29.1 (d,  $^1J_{C-P} = 50.2$  Hz,  $CH$ - $iPr$ ), 45.7 (N $CH_2$ -piperidine), 153.73 (CO). FTIR (KBr,  $cm^{-1}$ ):  $\nu = 3239$  v(NH), 2964, 2936, 2855 v(CH), 1436, 1227, 1024, 663 v(CN/NH), 1624 v(CO), 930 v(PN), 531 v(PSe). DART+ (m/z): 323 corresponding to  $^iPr_2P(Se)NHC(O)NC_5H_{10}$ . Microanalysis calculated for  $C_{12}H_{25}N_2SeOP$ : N = 8.67, C = 44.58, H = 7.79 %. Observed: N = 8.59, C = 44.49, H = 7.84 %.

**$[Zn\{^iPr_2P(Se)NC(S)NC_5H_{10-\kappa^2-Se,S}\}_2]$  (3).** 2.9 mmol of **1** and 1.45 mmol of  $ZnEt_2$ . White solid. Yield: 0.98 g (89%). M.p. 122-124 °C.  $^{31}P\{^1H\}$  NMR ( $C_6D_6$ , 298 K, 121.65 MHz, ppm):  $\delta = 61.8$  (s) ( $^1J_{P-Se} = 524.31$  Hz).  $^{77}Se\{^1H\}$  NMR ( $C_6D_6$ , 298 K, 57.28 MHz, ppm):  $\delta = -330.0$  ( $^1J_{Se-P} = 524.31$  Hz).  $^1H$  NMR ( $C_6D_6$ , 298 K, 300 MHz, ppm):  $\delta = 1.12$ -1.20 (m, 24H,  $CH_3$ - $iPr$ ), 1.23 (br, 4H,  $CH_2$ -piperidine), 1.33 (br, 8H,  $CH_2$ -piperidine), 2.21-2.40 (m, 4H,  $CH$ - $iPr$ ), 3.55 (br, 4H, N $CH_2$ -piperidine), 3.93 (br, 4H, N $CH_2$ -piperidine).  $^{13}C\{^1H\}$  ( $C_6D_6$ , 298 K, 75.56 MHz, ppm):  $\delta = 16.1$  ( $CH_3$ - $iPr$ ), 23.7 ( $CH_2$ -piperidine), 24.8 ( $CH_2$ -piperidine) 30.7 ( $CH$ - $iPr$ ), 45.6 (N $CH_2$ -piperidine), 48.9 (N $CH_2$ -piperidine), 174.3 (CS). FTIR (KBr,  $cm^{-1}$ ):  $\nu = 2961$ , 2928, 2864 v(CH), 1493, 1433, 1408, 1217 v(CN/CS), 968 v(PN), 509 v(PSe). EI (m/z): 741 corresponding to  $[Zn\{^iPr_2P(Se)NC(S)NC_5H_{10-\kappa^2-Se,S}\}_2]^+$ . Microanalysis calculated for  $C_{24}H_{48}N_4Se_2S_2P_2Zn$ : N = 7.55, C = 38.85, H = 6.52%. Observed: N = 7.62, C = 38.69, H = 6.65%.

**$[Zn\{^iPr_2P(Se)NC(O)NC_5H_{10-\kappa^2-Se,O}\}_2]$  (4).** 3.1 mmol of **2** and 1.55 mmol of  $ZnEt_2$ . White solid. Yield: 0.90 g (87%). M.p. 113-115 °C.  $^{31}P\{^1H\}$  NMR ( $C_6D_6$ , 298 K, 121.65 MHz, ppm):  $\delta = 54.58$  (s) ( $^1J_{P-Se} = 488$  Hz).  $^{77}Se\{^1H\}$  NMR ( $C_6D_6$ , 298 K, 57.28 MHz, ppm):  $\delta = -370.55$  ( $^1J_{Se-P} = 488$  Hz).  $^1H$  NMR ( $C_6D_6$ , 298 K, 300 MHz, ppm): (2d,  $\delta = 1.33$ ,  $^3J_{H-H} = 7$ ,  $CH_3$ - $iPr^b$ ;  $\delta = 1.39$ ,  $^3J_{H-H} = 7$ ,  $CH_3$ - $iPr^a$ , 24H), 2.16 (oc, ,  $^3J_{H-H} = 7$  Hz,  $^2J_{H-P} = 7$  Hz, 4H,  $CH$ - $iPr$ ), 1.52 (br, 12H,  $CH_2$ -piperidine), 3.71 (br, 8H, N $CH_2$ -piperidine).  $^{13}C\{^1H\}$  ( $C_6D_6$ , 298 K, 75.56 MHz, ppm):  $\delta = 17.5$  (d,  $^2J_{C-P} = 2$  Hz,  $CH_3$ - $iPr^b$ ), 17.23 ( $CH_3$ - $iPr^a$ ), 25.39 ( $CH_2$ -piperidine), 25.45 ( $CH_2$ -piperidine), 31.65 (d,  $^1J_{C-P} = 54$  Hz,  $CH$ - $iPr$ ), 49.52 (N $CH_2$ -piperidine), 51.89 (N $CH_2$ -piperidine), 163 (CS). FTIR (KBr,  $cm^{-1}$ ):  $\nu = 2961$ , 2926, 2849 v(CH), 1429, 1289, 1020, 649 v(CN), 1476 v(CO), 914 v(PN), 526 v(PSe). DART+ (m/z): **711** corresponding to  $[Zn\{^iPr_2P(Se)NC(O)NC_5H_{10-\kappa^2-Se,O}\}_2]^+$ . Microanalysis calculated for  $C_{24}H_{48}N_4Se_2O_2P_2Zn$ : N = 7.89, C = 40.60, H = 6.82 %. Observed: N = 7.96, C = 40.65, H = 7.0 %.

**$[Cd\{^iPr_2P(Se)NC(S)NC_5H_{10-\kappa^2-Se,S}\}_2]$  (5).** 2.9 mmol of **1** and 1.45 mmol of  $CdMe_2$ . White solid. Yield: 1.08 g (95%). M.p. 119-121 °C.  $^{31}P\{^1H\}$  NMR ( $C_6D_6$ , 298 K, 121.65 MHz, ppm):  $\delta = 60.79$  (s) ( $^1J_{P-Se} = 524.0$  Hz).  $^{77}Se\{^1H\}$  NMR ( $C_6D_6$ , 298 K, 57.28 MHz, ppm):  $\delta = -337.7$  ( $^1J_{Se-P} = 523.0$  Hz).  $^1H$  NMR ( $C_6D_6$ , 298 K, 300 MHz, ppm): (2t,  $\delta = 1.14$ ,  $^3J_{H-H} = 7$ ,  $^3J_{H-P} = 7$   $CH_3$ - $iPr^b$ ;  $\delta = 1.20$ ,  $^3J_{H-H} = 7$ ,  $^3J_{H-P} = 7$   $CH_3$ - $iPr^a$ , 24H), 1.22 (br, 4H,  $CH_2$ -piperidine), 1.35 (br, 8H,  $CH_2$ -piperidine), 2.40 (dsep,  $^3J_{H-H} = 7.0$  Hz,  $^2J_{H-P} = 11$  Hz,  $CH$ - $iPr$ , 4H), 3.55 (br, 4H, N $CH_2$ -piperidine), 3.98 (br, 4H, N $CH_2$ -piperidine).  $^{13}C\{^1H\}$  NMR ( $C_6D_6$ , 298 K, 75.56 MHz, ppm): (2d,  $\delta = 16.16$ ,  $^2J_{C-P} = 4$  Hz,  $CH_3$ - $iPr^b$ ;  $\delta = 16.42$ ,  $^2J_{C-P} = 2$  Hz,  $CH_3$ - $iPr^a$ ), 23.80 ( $CH_2$ -piperidine), 25.0

(CH<sub>2</sub>-piperidine), 31.14 (d, <sup>1</sup>J<sub>C-P</sub> = 63 Hz, CH-<sup>i</sup>Pr), 45.80 (NCH<sub>2</sub>-piperidine), 48.88 (NCH<sub>2</sub>-piperidine), 174.19 (CSe). FTIR (KBr, cm<sup>-1</sup>): ν = 2962, 2929, 2864 ν(CH), 1487, 1433, 1404, 1215 ν(CN/CS), 966 ν(PN), 511 ν(PSe). DART+ (m/z): 789 corresponding to [Cd{<sup>i</sup>Pr<sub>2</sub>P(Se)NC(S)NC<sub>5</sub>H<sub>10</sub>-κ<sup>2</sup>-Se,S}<sub>2</sub>]<sup>+</sup>. Microanalysis calculated for C<sub>24</sub>H<sub>48</sub>N<sub>4</sub>Se<sub>2</sub>S<sub>2</sub>P<sub>2</sub>Cd: N = 7.1, C = 36.53, H = 6.13 %. Observed: N = 7.19, C = 36.39, H = 6.23 %.

**[Cd{<sup>i</sup>Pr<sub>2</sub>P(Se)NC(O)NC<sub>5</sub>H<sub>10</sub>-κ<sup>2</sup>-Se,O}<sub>2</sub>] (6).** 3.1 mmol of **2** and 1.55 mmol of CdMe<sub>2</sub>. White solid. Yield: 1.09 g (93%). M.p. 120-122 °C. <sup>31</sup>P{<sup>1</sup>H} NMR (C<sub>6</sub>D<sub>6</sub>, 298 K, 121.65 MHz, ppm): δ = 52.63 (s) (<sup>1</sup>J<sub>P-Se</sub> = 476.70 Hz). <sup>77</sup>Se{<sup>1</sup>H} NMR (C<sub>6</sub>D<sub>6</sub>, 298 K, 57.28 MHz, ppm): δ = -366.4 (<sup>1</sup>J<sub>Se-P</sub> = 475 Hz). <sup>1</sup>H NMR (C<sub>6</sub>D<sub>6</sub>, 298 K, 300 MHz, ppm): (4d, δ = 1.11, <sup>3</sup>J<sub>H-H</sub> = 7, CH<sub>3</sub>-<sup>i</sup>Pr<sup>d</sup>; δ = 1.16, <sup>3</sup>J<sub>H-H</sub> = 7, CH<sub>3</sub>-<sup>i</sup>Pr<sup>c</sup>; δ = 1.27, <sup>3</sup>J<sub>H-H</sub> = 7, CH<sub>3</sub>-<sup>i</sup>Pr<sup>b</sup>; δ = 1.33, <sup>3</sup>J<sub>H-H</sub> = 7, CH<sub>3</sub>-<sup>i</sup>Pr<sup>a</sup>), 1.43 (m, 12H, CH<sub>2</sub>-piperidine), 2.16 (dsep, <sup>3</sup>J<sub>H-H</sub> = 7.0 Hz, <sup>2</sup>J<sub>H-P</sub> = 9 Hz, CH-<sup>i</sup>Pr, 4H), 3.20 (m, 8H, NCH<sub>2</sub>-piperidine). <sup>13</sup>C{<sup>1</sup>H} NMR (C<sub>6</sub>D<sub>6</sub>, 298 K, 75.56 MHz, ppm): δ = 16.70 (d, <sup>2</sup>J<sub>C-P</sub> = 3 Hz, CH<sub>3</sub>-<sup>i</sup>Pr<sup>b</sup>), 17.08 (CH<sub>3</sub>-<sup>i</sup>Pr<sup>a</sup>), 25.15 (CH<sub>2</sub>-piperidine), 26.24 (CH<sub>2</sub>-piperidine), 32.12 (d, <sup>1</sup>J<sub>C-P</sub> = 66 Hz, CH-<sup>i</sup>Pr), 45.18 (NCH<sub>2</sub>-piperidine), 164.5 (CO). FTIR (KBr, cm<sup>-1</sup>): ν = 2959, 2926, 2848 ν(CH), 1429, 1280, 1026, 626 ν(CN), 1487 ν(CO), 916 ν(PN), 526 ν(PSe). DART+ (m/z): 759 corresponding to [Cd{<sup>i</sup>Pr<sub>2</sub>P(Se)NC(O)NC<sub>5</sub>H<sub>10</sub>}<sub>2</sub>]<sup>+</sup>. FAB+ (m/z): 1193 corresponding to [Cd<sub>2</sub>{<sup>i</sup>Pr<sub>2</sub>P(Se)NC(O)NC<sub>5</sub>H<sub>10</sub>}<sub>3</sub>]<sup>+</sup>. Microanalysis calculated for C<sub>48</sub>H<sub>96</sub>Cd<sub>2</sub>N<sub>8</sub>O<sub>4</sub>P<sub>4</sub>Se<sub>4</sub>: N = 7.40, C = 38.08, H = 6.39%. Observed: N = 7.33, C = 37.97, H = 6.45%.

## 2. Table S1. Crystallographic Data for compounds **4**, **5** and **6**.

| Compound                                | <b>4</b>                                                                                        | <b>5</b>                                                                                       | <b>6</b>                                                                                                     |
|-----------------------------------------|-------------------------------------------------------------------------------------------------|------------------------------------------------------------------------------------------------|--------------------------------------------------------------------------------------------------------------|
| Formula                                 | C <sub>24</sub> H <sub>48</sub> N <sub>4</sub> O <sub>2</sub> P <sub>2</sub> Se <sub>2</sub> Zn | C <sub>24</sub> H <sub>48</sub> CdN <sub>4</sub> P <sub>2</sub> S <sub>2</sub> Se <sub>2</sub> | C <sub>48</sub> H <sub>96</sub> Cd <sub>2</sub> N <sub>8</sub> O <sub>4</sub> P <sub>4</sub> Se <sub>4</sub> |
| M [g/mol]                               | 709.89                                                                                          | 789.04                                                                                         | 1513.84                                                                                                      |
| Temperature                             | 298(2) K                                                                                        | 298(2) K                                                                                       | 298(2) K                                                                                                     |
| Crystal size (mm)                       | 0.402 x 0.309 x 0.156                                                                           | 0.437 x 0.372 x 0.114                                                                          | 0.287 x 0.211 x 0.140                                                                                        |
| Crystal system                          | Triclinic                                                                                       | Monoclinic                                                                                     | Monoclinic                                                                                                   |
| Space group                             | P -1 (2)                                                                                        | C 2/c (15)                                                                                     | P2 <sub>1</sub> /c (14)                                                                                      |
| ρ <sub>calc</sub> (g cm <sup>-3</sup> ) | 1.460                                                                                           | 1.519                                                                                          | 1.521                                                                                                        |
| Z                                       | 2                                                                                               | 4                                                                                              | 2                                                                                                            |
| a (Å)                                   | 9.0915(3)                                                                                       | 16.1883(2)                                                                                     | 11.8582(11)                                                                                                  |
| b (Å)                                   | 11.0372(3)                                                                                      | 17.1917(2)                                                                                     | 13.3662(12)                                                                                                  |
| c (Å)                                   | 16.6969(5)                                                                                      | 13.48050(10)                                                                                   | 21.3305(18)                                                                                                  |
| α (°)                                   | 98.7490(10)                                                                                     | 90.00                                                                                          | 90.00                                                                                                        |
| β (°)                                   | 91.2890(10)                                                                                     | 113.1140(10)                                                                                   | 102.189(5)                                                                                                   |
| γ (°)                                   | 102.3670(10)                                                                                    | 90.00                                                                                          | 90.00                                                                                                        |
| V (Å <sup>3</sup> )                     | 1614.89(8)                                                                                      | 3450.52(7)                                                                                     | 3304.6(5)                                                                                                    |
| μ (mm <sup>-1</sup> )                   | 3.139                                                                                           | 2.976                                                                                          | 2.986                                                                                                        |
| F(000)                                  | 728                                                                                             | 1592                                                                                           | 1528                                                                                                         |
| Reflections Collected                   | 14098                                                                                           | 14591                                                                                          | 18757                                                                                                        |
| Unique reflections, R <sub>int</sub>    | 5929, 0.0222                                                                                    | 3162, 0.0247                                                                                   | 6020; 0.0361                                                                                                 |
| R1, wR2 [I > 2σ(I)]                     | 0.0290; 0.0664                                                                                  | 0.0315, 0.0793                                                                                 | 0.0359; 0.0569                                                                                               |
| R1, wR2 (all data)                      | 0.0386; 0.0703                                                                                  | 0.0397, 0.0840                                                                                 | 0.0752; 0.0833                                                                                               |
| Goof                                    | 1.032                                                                                           | 1.039                                                                                          | 1.029                                                                                                        |

**3. Fig. S1.** Micrographs of annealed zinc thin films (**3Fa** and **4Fa**). **3Fa** SEM images (magn. 10000x and 60000x), AFM phase (1 x 1  $\mu\text{m}$ ) micrographs. **4Fa** SEM images (magn. 10000x and 60000x), and AFM phase (1 x 1  $\mu\text{m}$ ) micrographs.

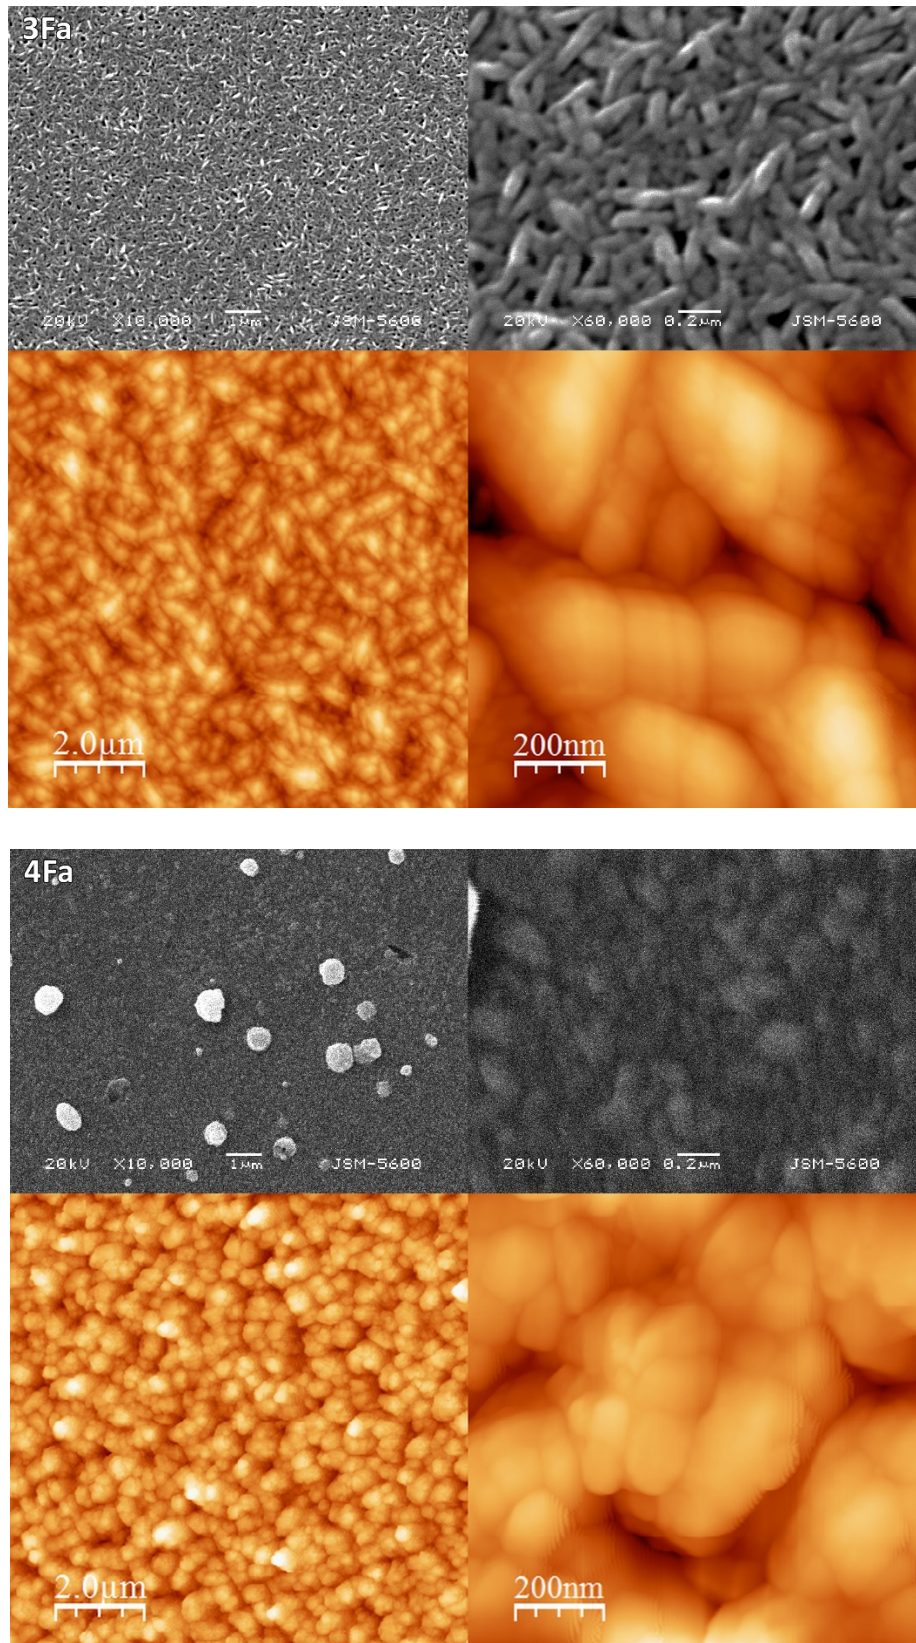



4. **Fig. S2.** Micrographs of annealed cadmium thin films (**5Fa** and **6Fa**). **5Fa** SEM images (magn. 10000x and 60000x), AFM phase (1 x 1  $\mu\text{m}$ ) micrographs. **6Fa** SEM images (magn. 10000x and 60000x), and AFM phase (1 x 1  $\mu\text{m}$ ) micrographs.

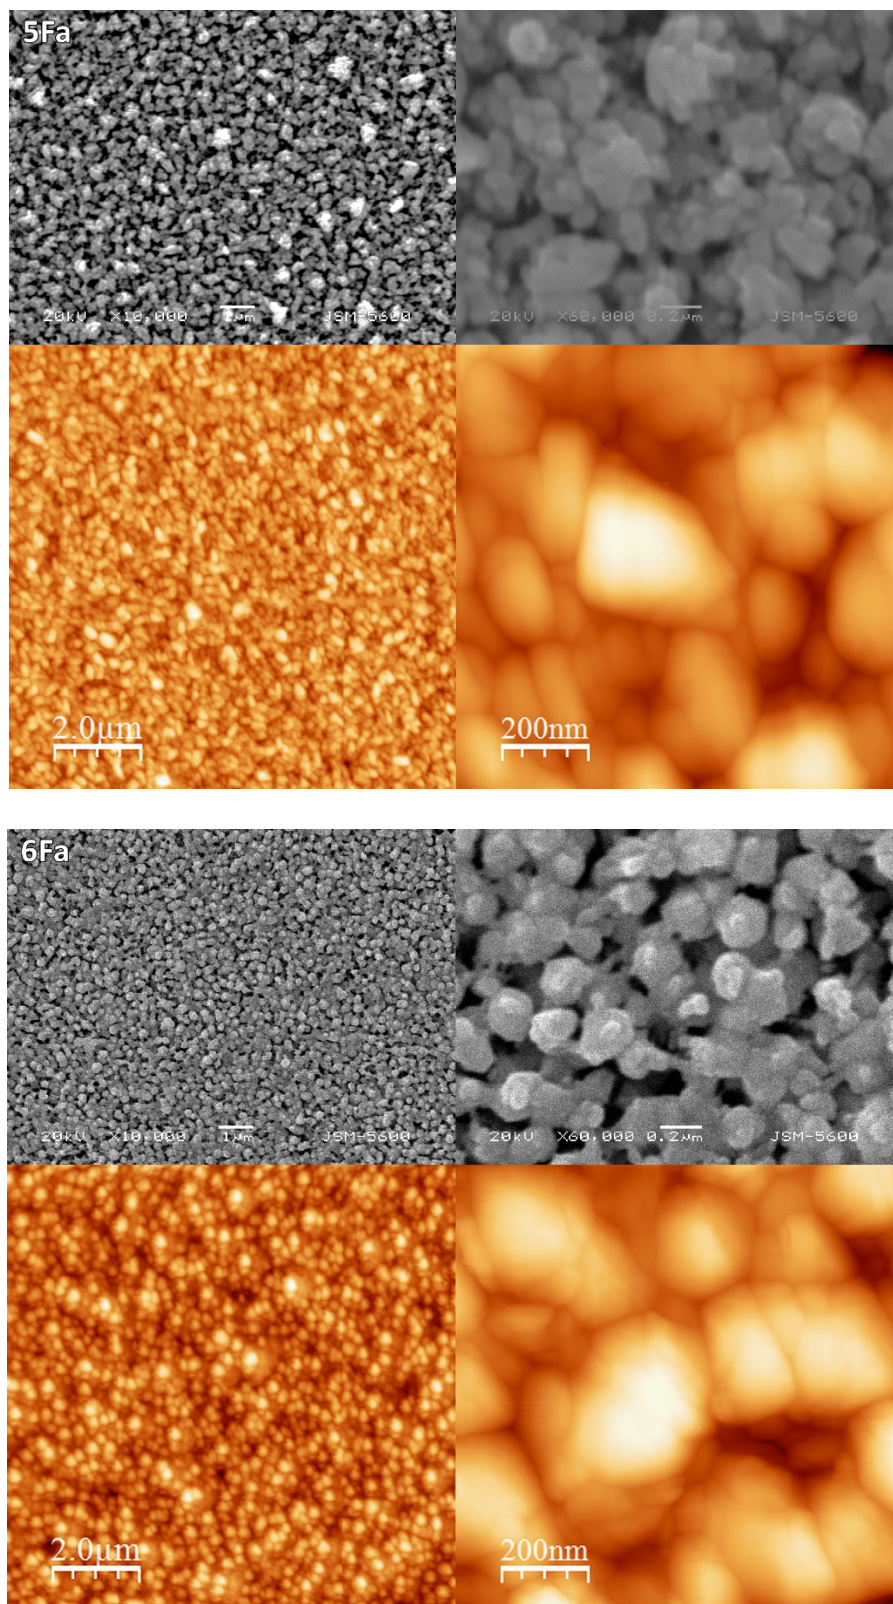

5. **Fig. S3.** Optical band gap ( $E_g$ ) estimation. Example of a)  $(\alpha hv)^2$  versus photon energy ( $hv$ ) plot for as-deposited Zn<sub>1.41</sub>So<sub>0.40</sub>Se<sub>0.60</sub> film (**3F**, as-deposited at 450°C) and b) the first derivative plot of transmittance spectra ( $dT/d(hv)$ ).

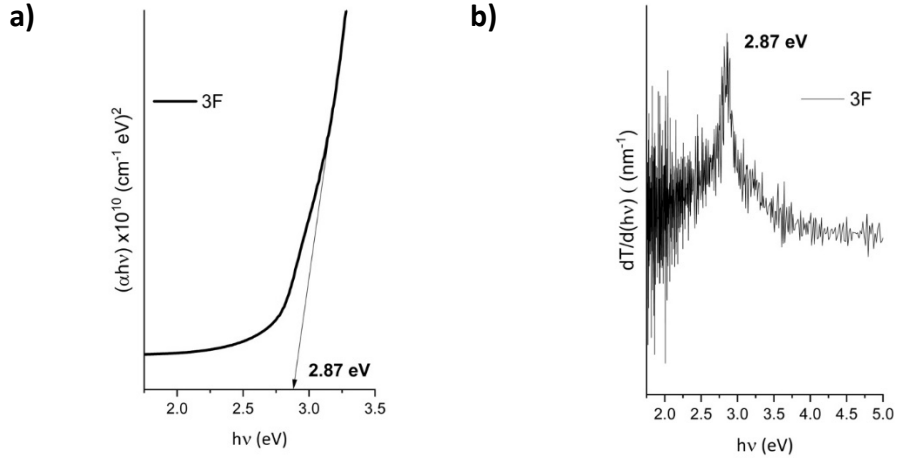

a) The optical band gap ( $E_g$ ) were estimated using Tauc's relationship:<sup>4</sup>

$$\alpha hv = B(hv - E_g)^{1/m} \quad (4)$$

$$\alpha = -\frac{1}{t} \ln T \quad (5)$$

$$E_{\text{phonon}} = \frac{hc}{\lambda} \quad (6)$$

where  $\alpha$  is the absorption coefficient,  $hv$  is the incident photon energy,  $B$  is the energy-dependent constant,  $E_g$  is the optical band gap of the material, and  $m$  is the transition coefficient which can be 1/2, 3/2, 2, and 3, in this case  $m = 2$  for direct allowed transitions and  $\alpha$  was evaluated using the following relation (5) where  $t$  is the film thickness,  $T$  the transmittance. The optical energy gap,  $E_g$  of the investigated MSe thin films, were obtained from plot  $(\alpha hv)^2$  versus the photon energy ( $hv$ ) by extrapolating linear part to intersect  $(hv)$  axis at  $(\alpha hv)^2 = 0$  (Fig. S4 for annealed films).

b) Similar values were obtained by means of the first derivative plots of transmittance spectra ( $dT/d(hv)$ ).<sup>5</sup>

6. **Fig. S4.** Optical band gap ( $E_g$ ) estimation. Plot of  $(\alpha hv)^2$  versus photon energy ( $hv$ ) for annealed zinc and cadmium films(**3Fa-6Fa**, annealed at 600°C).

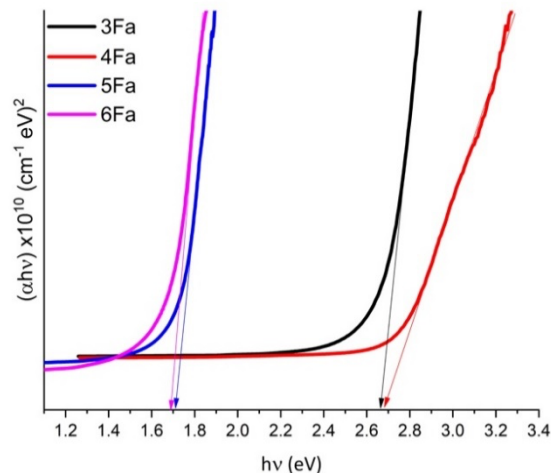

**7. Fig. S5 a)** XPS survey spectra of **5F** before and after Ar<sup>+</sup> etching process (as an example showing the disappearance of O-1s and C-1s features after etching process). Core-level HR-XPS spectra: **b)** Valence bands and corresponding Zn-3d (**3F** and **4F**) and Cd-4d (**5F** and **6F**), **c)** Zn 3s, Se LMM, P 2p region (**3F** and **4F**) and Se LMM, P 2p region (**5F** and **6F**), **d)** O 1s for **3F-6F**.

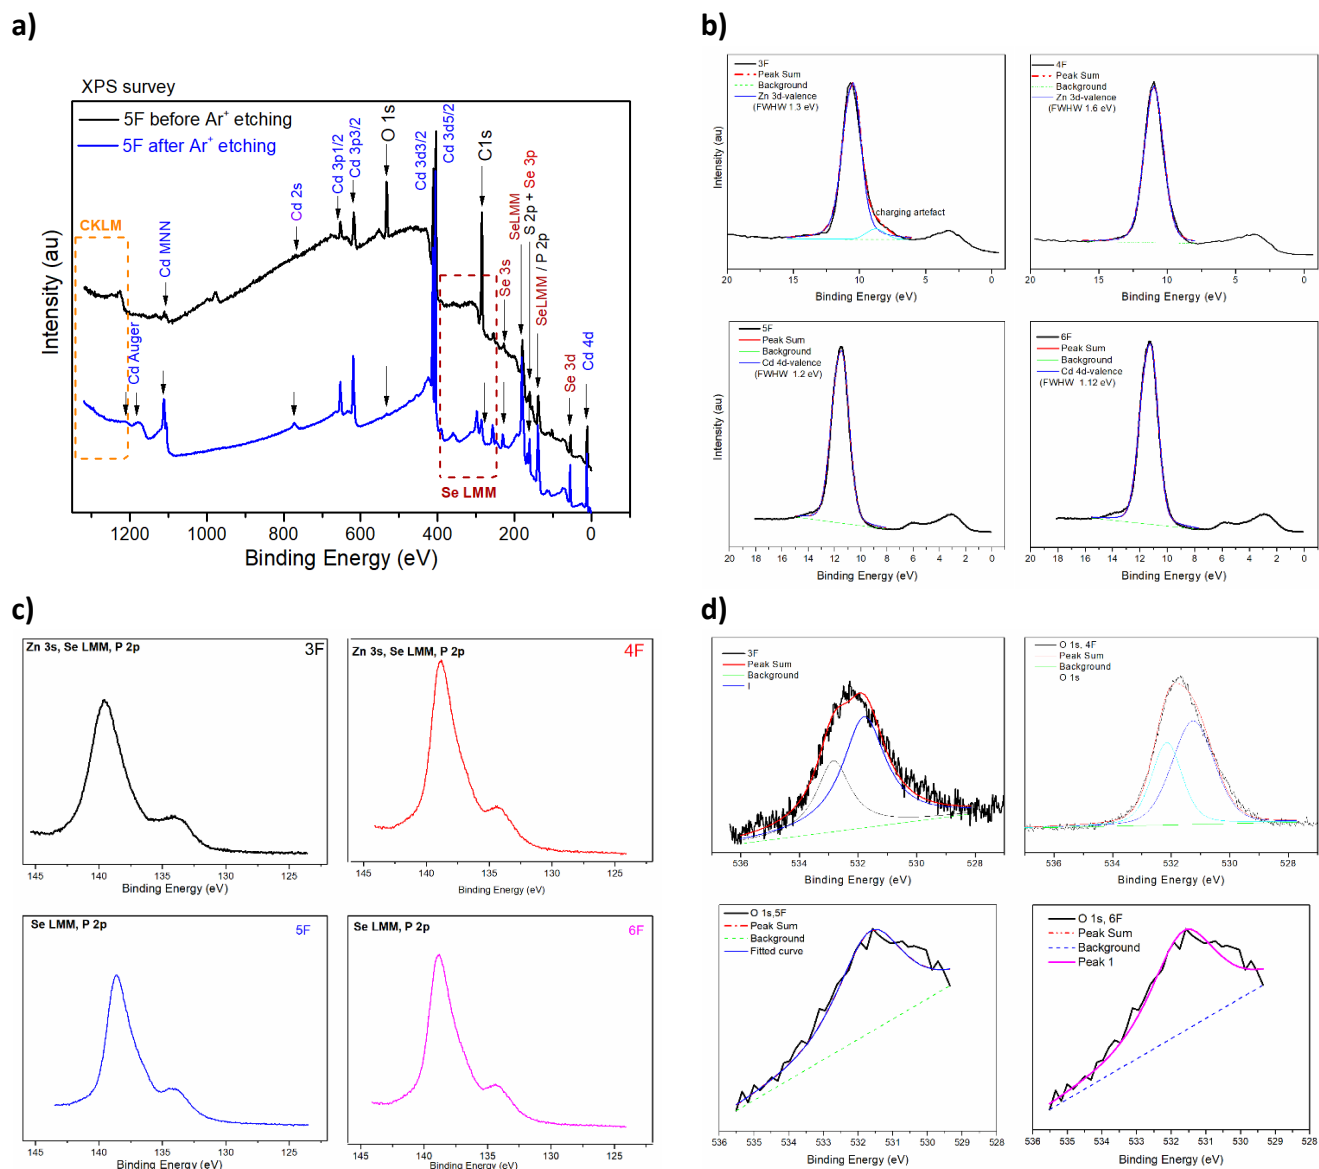

Experimental details. XPS spectra were performed on stored **3F-6F** (Thermo K-alpha spectrometer, Al K $\alpha$  X-ray source, 1486.68 eV). The samples were introduced into an ultra-high vacuum (UHV) chamber ( $1 \times 10^{-7}$ – $1 \times 10^{-8}$  Pa) and measured at room temperature. For every sample, survey spectra and individual core level spectra were obtained under the same conditions before and after Ar<sup>+</sup> etching (initial and final spectra). Depth profile was acquired until the intensity of core level peaks reached to constant value. The spot size in the beam was 300  $\mu$ m and the pass energy was set to 150 eV for the survey spectra (energy step 1.0 eV), 25 eV for recording C 1s and O 1s, and 50 eV for recording the individual core level spectra. 10 scans were performed for C 1s, Cd 4d, Cd 3d, O 1s, P 2p, S 2p, Se 3p, Se 3d and Zn 2p core level with an energy step size of 0.030 eV except for O 1s (0.020 eV), S 2p (0.022 eV), Se 3p (0.025 eV), Se 3d (0.021 eV) and Zn 2p (0.06 eV). The relative atomic concentrations were

determined from the primary core level XPS peak (Cd-3d, O-1s, S-2p, Se-3d and Zn-2p) and the sensitive factors provided by the XPS apparatus (SDPv4.1 software®). The high-resolution regions of interest were fitted using Tougaard or linear background with a symmetric Gauss-Lorentz sum function.

**8. Table S2.** Band gaps ( $E_g$ ) of our films\* and related MSe and MSSe thin films obtained from different precursors and/or technique.

| Material                                             | Precursor                                                                                                                          | Preparation method (solvent)                                                         | T <sub>prep</sub> (°C) | E <sub>g</sub> (eV) | Ref |      |
|------------------------------------------------------|------------------------------------------------------------------------------------------------------------------------------------|--------------------------------------------------------------------------------------|------------------------|---------------------|-----|------|
| ZnSSe                                                | [Zn{Pr <sub>2</sub> P(Se)NC(S)NC <sub>5</sub> H <sub>10</sub> -K <sup>2</sup> -Se,S <sub>2</sub> }] (3)                            | AACVD (Toluene)                                                                      | 375                    | 2.93                | *   |      |
| ZnSSe                                                | [Zn{Pr <sub>2</sub> P(Se)NC(S)NC <sub>5</sub> H <sub>10</sub> -K <sup>2</sup> -Se,S <sub>2</sub> }] (3)                            |                                                                                      | 450                    | 2.87                | *   |      |
| ZnSSe                                                | [Zn{Pr <sub>2</sub> P(Se)NC(S)NC <sub>5</sub> H <sub>10</sub> -K <sup>2</sup> -Se,S <sub>2</sub> }] (3)                            |                                                                                      | annealed (600)         | 2.67                | *   |      |
| ZnSe                                                 | [Zn{Pr <sub>2</sub> P(Se)NC(O)NC <sub>5</sub> H <sub>10</sub> -K <sup>2</sup> -Se,O <sub>2</sub> }] (4)                            |                                                                                      | 375                    | 2.74                | *   |      |
| ZnSe                                                 | [Zn{Pr <sub>2</sub> P(Se)NC(O)NC <sub>5</sub> H <sub>10</sub> -K <sup>2</sup> -Se,O <sub>2</sub> }] (4)                            |                                                                                      | 450                    | 2.71                | *   |      |
| ZnSe                                                 | [Zn{Pr <sub>2</sub> P(Se)NC(O)NC <sub>5</sub> H <sub>10</sub> -K <sup>2</sup> -Se,O <sub>2</sub> }] (4)                            |                                                                                      | annealed (600)         | 2.68                | *   |      |
| ZnSe                                                 | [Zn(Se <sub>2</sub> CNEt <sub>2</sub> ) <sub>2</sub> ]                                                                             | AACVD (THF)                                                                          | 350                    | 2.25                | 6   |      |
| Zn <sub>x</sub> Se <sub>1-x</sub> Se <sub>rich</sub> | [Zn(Se <sub>2</sub> CNEt <sub>2</sub> ) <sub>2</sub> ]:[Zn(S <sub>2</sub> CNEt <sub>2</sub> ) <sub>2</sub> ] 1:0.75                |                                                                                      | 350                    | 2.55                | 6   |      |
| 1:1 (S:Se)                                           | [Zn(Se <sub>2</sub> CNEt <sub>2</sub> ) <sub>2</sub> ]: [Zn(S <sub>2</sub> CNEt <sub>2</sub> ) <sub>2</sub> ] 1:1                  |                                                                                      | 350                    | 2.66                | 6   |      |
| ZnSe                                                 | Na <sub>2</sub> SeSO <sub>3</sub> + Zn <sup>2+</sup>                                                                               | CBD                                                                                  | 25                     | 3.04                | 7   |      |
|                                                      |                                                                                                                                    |                                                                                      | 45                     | 3.02                |     |      |
|                                                      |                                                                                                                                    |                                                                                      | 60                     | 2.89                |     |      |
|                                                      |                                                                                                                                    |                                                                                      | 80                     | 2.82                |     |      |
| ZnSe                                                 | [Zn{Pr <sub>2</sub> P(Se)NP(Se)Pr <sub>2</sub> }]                                                                                  | LP-MOCVD                                                                             | 425-450                | 2.63                | 8   |      |
| ZnSe                                                 | Zn(CH <sub>3</sub> COO) <sub>2</sub> ·2H <sub>2</sub> O and SeO <sub>2</sub>                                                       | Electrodeposition by three-electrode set-up (water)                                  | 27                     | 2.7                 | 9   |      |
| ZnSe                                                 | ZnSO <sub>4</sub> and Na <sub>2</sub> (SeSO <sub>3</sub> )                                                                         | CBD (water)                                                                          | 80                     | 2.65                | 10  |      |
| ZnSe                                                 | ZnSO <sub>4</sub> ·7H <sub>2</sub> O, SeO <sub>2</sub><br>Using different complexing agents:                                       | Electrochemical deposition                                                           | 50                     |                     | 11  |      |
|                                                      | Ammonia                                                                                                                            |                                                                                      |                        |                     |     | 2.45 |
|                                                      | Citric acid                                                                                                                        |                                                                                      |                        |                     |     | 2.58 |
|                                                      | EDTA                                                                                                                               |                                                                                      |                        |                     |     | 2.45 |
|                                                      | Ethylenediamine                                                                                                                    |                                                                                      |                        |                     |     | 2.53 |
|                                                      | Hydrazine hydrate                                                                                                                  |                                                                                      |                        |                     |     | 2.47 |
|                                                      | Polyvinyl alcohol                                                                                                                  |                                                                                      |                        |                     |     | 2.56 |
|                                                      | Triethanolamine                                                                                                                    | 2.64                                                                                 |                        |                     |     |      |
| ZnS                                                  | ZnS and ZnSe powder                                                                                                                | Evaporation                                                                          |                        | 3                   | 12  |      |
| ZnS <sub>0.73</sub> Se <sub>0.27</sub>               |                                                                                                                                    |                                                                                      |                        | 2.82                |     |      |
| ZnS <sub>0.68</sub> Se <sub>0.32</sub>               |                                                                                                                                    |                                                                                      |                        | 2.77                |     |      |
| ZnS <sub>0.36</sub> Se <sub>0.64</sub>               |                                                                                                                                    |                                                                                      |                        | 2.68                |     |      |
| ZnSe                                                 |                                                                                                                                    |                                                                                      |                        | 2.25                |     |      |
| ZnSe                                                 | ZnSO <sub>4</sub> , SeC(NH <sub>2</sub> ) <sub>2</sub> , NH <sub>4</sub> OH (25%),<br>Varying (hydrazine hydrate) : (Na3-citrate)  | CBD                                                                                  | 80                     |                     | 13  |      |
|                                                      | Sol. A (0:10)                                                                                                                      |                                                                                      |                        |                     |     | 2.65 |
|                                                      | Sol. B (2:8)                                                                                                                       |                                                                                      |                        |                     |     | 2.69 |
|                                                      | Sol. C (3:7)                                                                                                                       |                                                                                      |                        |                     |     | 2.72 |
|                                                      | Sol. D (5:5)                                                                                                                       |                                                                                      |                        |                     |     | 2.95 |
|                                                      | Sol. E (7:3)                                                                                                                       |                                                                                      |                        |                     |     | 3.48 |
|                                                      | Sol. F (8:2)                                                                                                                       | 3.55                                                                                 |                        |                     |     |      |
| ZnSe                                                 | ZnSe powder As-deposited                                                                                                           | Pulsed laser deposition<br>(2×10 <sup>-25</sup> Torr, Nd:YAG(λ:355 nm))              |                        | 2.65                | 14  |      |
|                                                      | Annealed at 350 and 400                                                                                                            |                                                                                      |                        | annealed (350)      |     | 2.7  |
|                                                      |                                                                                                                                    |                                                                                      |                        | annealed (400)      |     | 2.56 |
| ZnSe                                                 | ZnSe particles (99.99%)                                                                                                            | Electron beam evaporation<br>technique (2.0×10 <sup>-3</sup> Pa) and<br>annealed at: |                        | as-deposited        | 15  |      |
|                                                      |                                                                                                                                    |                                                                                      |                        | 300                 |     | 2.58 |
|                                                      |                                                                                                                                    |                                                                                      |                        | 400                 |     | 2.52 |
|                                                      |                                                                                                                                    |                                                                                      |                        | 500                 |     | 2.43 |
|                                                      |                                                                                                                                    |                                                                                      |                        | 600                 |     | 2.43 |
| ZnSe                                                 | 100 mM ZnSO <sub>4</sub> and 1 mM SeO <sub>2</sub> in H <sub>2</sub> SO <sub>4</sub><br>and NaOH (pH=2)                            | Electrodeposition on Pt<br>electrodes                                                | RT                     | 2.73                | 16  |      |
| ZnSe                                                 | ZnSO <sub>4</sub> , Se, Na <sub>2</sub> SO <sub>3</sub> , Na3-citrate, triethanolamine<br>(TEA), hydrazine hydrate, and NaOH (pH), | Solution growth technique<br>(SGT).                                                  | 80                     | 2.71                | 17  |      |
| CdSSe                                                | [Cd{Pr <sub>2</sub> P(Se)NC(S)NC <sub>5</sub> H <sub>10</sub> -K <sup>2</sup> -Se,S <sub>2</sub> }] (5)                            |                                                                                      | 375                    | 1.80                | *   |      |
| CdSSe                                                | [Cd{Pr <sub>2</sub> P(Se)NC(S)NC <sub>5</sub> H <sub>10</sub> -K <sup>2</sup> -Se,S <sub>2</sub> }] (5)                            |                                                                                      | 450                    | 1.77                | *   |      |



|                                             |                                                                                                                                                      |                                                                        |                |             |    |
|---------------------------------------------|------------------------------------------------------------------------------------------------------------------------------------------------------|------------------------------------------------------------------------|----------------|-------------|----|
| CdS <sub>Se</sub>                           | [Cd{ <sup>i</sup> Pr <sub>2</sub> P(Se)NC(S)NC <sub>5</sub> H <sub>10</sub> -κ <sup>2</sup> -Se,S <sub>2</sub> }] (5)                                | AACVD (Toluene)                                                        | annealed (600) | 1.71        | *  |
| CdSe                                        | [Cd{ <sup>i</sup> Pr <sub>2</sub> P(Se)NC(O)NC <sub>5</sub> H <sub>10</sub> -κ <sup>2</sup> -Se,O <sub>2</sub> }] (6)                                |                                                                        | 375            | 1.76        | *  |
| CdSe                                        | [Cd{ <sup>i</sup> Pr <sub>2</sub> P(Se)NC(O)NC <sub>5</sub> H <sub>10</sub> -κ <sup>2</sup> -Se,O <sub>2</sub> }] (6)                                |                                                                        | 450            | 1.74        | *  |
| CdSe                                        | [Cd { <sup>i</sup> Pr <sub>2</sub> P(Se)NC(O)NC <sub>5</sub> H <sub>10</sub> -κ <sup>2</sup> -Se,O <sub>2</sub> }] (6)                               |                                                                        | annealed (600) | 1.69        | *  |
| CdSe                                        | [Cd( <sup>i</sup> Pr <sub>2</sub> P(Se)NP(Se) <sup>i</sup> Pr <sub>2</sub> ) <sub>2</sub> ]                                                          | LP-MOCVD                                                               | 475-500        | 1.71        | 8  |
| CdSe                                        | [MeCd( <sup>i</sup> Pr <sub>2</sub> P(Se)NP(Se) <sup>i</sup> Pr <sub>2</sub> ) <sub>2</sub> ]                                                        | LP-MOCVD                                                               | 450            | 1.73        | 18 |
| CdSe                                        | [Cd(Se <sub>2</sub> CNEt <sub>2</sub> ) <sub>2</sub> ] <sub>2</sub>                                                                                  | AACVD (THF)                                                            | 300            | 1.75        | 19 |
| Cd <sub>0.2</sub> Se <sub>0.8</sub>         | [Cd(Se <sub>2</sub> CNEt <sub>2</sub> ) <sub>2</sub> ] <sub>2</sub> : [Cd(S <sub>2</sub> CNEt <sub>2</sub> ) <sub>2</sub> ] <sub>2</sub> (1:1 & 2:1) | AACVD (THF)                                                            | 300            | 1.9         | 19 |
| Cd <sub>0.4</sub> Se <sub>0.6</sub>         |                                                                                                                                                      |                                                                        |                | 2.0         |    |
| n-CdSeS                                     | CdCl <sub>2</sub> , KI, elemental Se and S)                                                                                                          | galvanostatic method                                                   | 130            | 2.26 - 2.48 | 20 |
| CdSe                                        | CdSe NPs                                                                                                                                             |                                                                        | RT             | 2.41        | 21 |
|                                             |                                                                                                                                                      | CBD                                                                    | 60             | 2.36        |    |
|                                             |                                                                                                                                                      |                                                                        | 70             | 2.25        |    |
|                                             |                                                                                                                                                      |                                                                        | 80             | 2.38        |    |
| CdS                                         | CdS <sub>1-x</sub> Se <sub>x</sub> /ITO thin films                                                                                                   |                                                                        | 90             | 2.37        | 22 |
| Cd <sub>0.75</sub> Se <sub>0.25</sub>       | 0.1 M CdCl <sub>2</sub> + 0.33 M CS(NH <sub>2</sub> ) <sub>2</sub> + 0.1 M Na <sub>2</sub> SeSO <sub>3</sub>                                         | CBD during 2 h                                                         |                | 2.18        |    |
| Cd <sub>0.5</sub> Se <sub>0.5</sub>         | solutions (different proportions)                                                                                                                    |                                                                        |                | 2.02        |    |
| Cd <sub>0.25</sub> Se <sub>0.75</sub>       |                                                                                                                                                      |                                                                        |                | 1.92        |    |
| CdSe                                        |                                                                                                                                                      |                                                                        |                | 1.86        |    |
| CdS                                         | CdSO <sub>4</sub> ·8H <sub>2</sub> O,                                                                                                                | electrochemical atomic layer                                           |                | 2.42-1.64   | 23 |
| Cd <sub>x</sub> Se <sub>1-x</sub>           | HClO <sub>4</sub> , NH <sub>4</sub> OH, CH <sub>3</sub> COONa·3H <sub>2</sub> O, CH <sub>3</sub> COOH,                                               | epitaxy (ECALE)                                                        |                |             |    |
| CdSe                                        | Na <sub>2</sub> S                                                                                                                                    |                                                                        |                |             |    |
| Cd <sub>0.5</sub> Se <sub>0.5</sub>         | Cadmium sulfide, cadmium selenide and cadmium chloride sintering process.                                                                            | screen-printing method                                                 | 120            | 2.1         | 24 |
| Cd <sub>0.5</sub> Se <sub>0.5</sub>         | cadmium chloride, thiourea and sodium seleno-sulphate and 8-hydroxyquinoline                                                                         | CBD                                                                    | 70             | 2.2         | 25 |
| Cd <sub>0.55</sub> Se <sub>0.45</sub>       | CdS <sub>1-x</sub> Se <sub>x</sub> nanocrystals in a borosilicate glass matrix from commercially available samples                                   | diffusion-limited growth (solid-state precipitation)                   |                | 2.45        | 26 |
| Cd <sub>0.75</sub> Se <sub>0.25</sub>       | CdCl <sub>2</sub> (0.033 M), Cd(NH <sub>2</sub> ) <sub>2</sub> (0.033 M), Na <sub>2</sub> SeSO <sub>3</sub> (0.1 M).<br>Deposition time (min):       | Chemical solution deposition                                           | 75             |             | 27 |
|                                             |                                                                                                                                                      |                                                                        |                | 2.25        |    |
|                                             |                                                                                                                                                      |                                                                        |                | 2.28        |    |
|                                             |                                                                                                                                                      |                                                                        |                | 2.27        |    |
| Cd <sub>0.8</sub> Se <sub>0.2</sub>         | CdS <sub>1-x</sub> Se <sub>x</sub> thin film:                                                                                                        |                                                                        | 80±75          | 2.16        | 28 |
| Cd <sub>0.6</sub> Se <sub>0.4</sub>         | CdSO <sub>4</sub> (0.1 M) and thiourea (0.2 M)                                                                                                       | CBD (in air)                                                           | "              | 2.03        |    |
| Cd <sub>0.4</sub> Se <sub>0.6</sub>         | CdSO <sub>4</sub> (20mL) + thiourea + Na <sub>2</sub> (S(Se)O <sub>3</sub> )                                                                         |                                                                        | "              | 1.97        |    |
| Cd <sub>0.2</sub> Se <sub>0.8</sub>         | " " "                                                                                                                                                |                                                                        | "              | 1.8         |    |
| CdSe                                        | CdSO <sub>4</sub> + Na <sub>2</sub> (S(Se)O <sub>3</sub> )                                                                                           |                                                                        | 50±5 °C        | 1.73        |    |
| 2D CdS <sub>x</sub> Se <sub>1-x</sub> alloy | CdCl <sub>2</sub> (s)+ S(s) + Se(s)                                                                                                                  | PVD                                                                    | 800            | 1.8-2.3 PL  | 29 |
| CdS                                         | CdS and CdSe (99.999%)                                                                                                                               | Thermal co-evaporation of source materials (2 x 10 <sup>-6</sup> mbar) | RT             | 2.43        | 30 |
| Cd <sub>0.8</sub> Se <sub>0.2</sub>         |                                                                                                                                                      |                                                                        |                | 2.13        |    |
| Cd <sub>0.6</sub> Se <sub>0.4</sub>         |                                                                                                                                                      |                                                                        |                | 1.99        |    |
| Cd <sub>0.4</sub> Se <sub>0.6</sub>         |                                                                                                                                                      |                                                                        |                | 1.83        |    |
| Cd <sub>0.2</sub> Se <sub>0.8</sub>         |                                                                                                                                                      |                                                                        |                | 1.79        |    |
| CdSe                                        |                                                                                                                                                      |                                                                        |                | 1.65        |    |

\*This work

9. Fig. S6. PL spectra ( $\lambda_{ex} = 488$  nm) of as-deposited films at 375°C: a) 3Fb and 4Fb, and b) 5Fb and 6Fb.

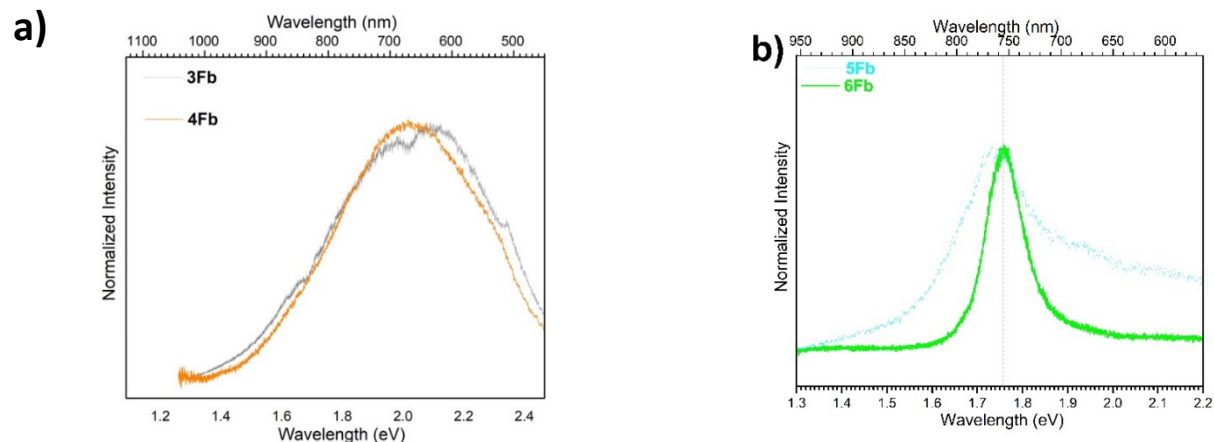

## Notes and references

- 1 I. D. I. D. Rojas-Montoya, A. Santana-Silva, V. García-Montalvo, M.-Á. Muñoz-Hernández and M. Rivera, *New J. Chem.*, 2014, **38**, 4702–4710.
- 2 V. Flores-Romero, O. L. García-Guzmán, A. Aguirre-Bautista, I. D. Rojas-Montoya, V. García-Montalvo, M. Rivera, O. Jiménez-Sandoval, M. Á. Muñoz-Hernández and S. Hernández-Ortega, *New J. Chem.*, 2020, **44**, 10367–10379.
- 3 V. Montiel-Palma, E. Huitrón-Rattinger, S. Cortés-Llamas, M.-Á. Muñoz-Hernández, V. García-Montalvo, E. López-Honorato and C. Silvestru, *Eur. J. Inorg. Chem.*, 2004, 3743–3750.
- 4 A. S. Hassanien, K. A. Aly and A. A. Akl, *J. Alloys Compd.*, 2016, **685**, 733–742.
- 5 M. Isik and N. Gasanly, *Mater. Chem. Phys.*, 2017, **190**, 74–78.
- 6 Y. Alghamdi, *Mater. Sci. Appl.*, 2017, **8**, 726–737.
- 7 V. Mehta, D. Shikha, J. Sharma and R. P. Chauhan, *J. Mater. Sci. Mater. Electron.*, 2018, **29**, 8801–8808.
- 8 M. Afzaal, D. Crouch, M. A. Malik, M. Motevalli, P. O'Brien, J.-H. H. Park, J. D. Woollins, P. O'Brien, J.-H. Park and J. D. Woollins, *Eur. J. Inorg. Chem.*, 2004, 171–177.
- 9 Y. G. Gudage, N. G. Deshpande, A. A. Sagade and R. Sharma, *J. Alloys Compd.*, 2009, **488**, 157–162.
- 10 S. Thirumavalavan, K. Mani and S. Sagadevan, *Mater. Today Proc.*, 2016, **3**, 2305–2314.
- 11 P. Prabukanthan, T. Rajesh Kumar and G. Harichandran, *J. Mater. Sci. Mater. Electron.*, 2017, **28**, 14728–14737.
- 12 R. G. Valeev, E. A. Romanov, V. L. Vorobiev, V. V. Mukhgalin, V. V. Kriventsov, A. I. Chukavin and B. V. Robouch, *Mater. Res. Express*, 2015, **2**, 25006.
- 13 G. L. Agawane, S. W. Shin, M. P. Suryawanshi, K. V. Gurav, A. V. Moholkar, J. Y. Lee, P. S. Patil, J. H. Yun and J. H. Kim, *Ceram. Int.*, 2014, **40**, 367–374.
- 14 T. M. Khan, M. Zakria, M. Ahmad and R. I. Shakoor, *J. Lumin.*, 2014, **147**, 97–106.
- 15 K. Ou, S. Wang, L. Bai, Y. Wang, K. Zhang and L. Yi, *Thin Solid Films*, 2019, **669**, 247–252.
- 16 M. F. Gromboni and L. H. Mascaro, *J. Electroanal. Chem.*, 2016, **780**, 360–366.
- 17 H. K. Sadekar, A. V. Ghule and R. Sharma, *Compos. Part B Eng.*, 2013, **44**, 553–557.
- 18 M. Afzaal, D. Crouch, M. A. Malik, M. Motevalli, P. O'Brien and J.-H. H. Park, *J. Mater. Chem.*, 2003, **13**, 639–640.
- 19 P. Kevin, Y. G. Alghamdi, D. J. Lewis and M. Azad Malik, *Mater. Sci. Semicond. Process.*, 2015, **40**, 848–854.
- 20 M. Hazra, A. Jana and J. Datta, *Appl. Surf. Sci.*, 2018, **454**, 334–342.
- 21 A. Smida, Z. Zaaboub, N. B. H. Mohamed, M. Hassen, F. Laatar, H. Maaref and H. Ezzaouia, *J. Lumin.*, 2018, **194**, 686–691.
- 22 M. de los A. Hernandez-Perez, E. A. Sanchez-Ramirez, F. J. Castillo-Plata, A. Manzo-Robledo, J. R. Aguilar-Hernandez, A. Ezeta-Mejia, J. Sastre-Hernandez, E. Ramirez-Meneses, M. Villanueva-Ibañez and A. A. Flores-Caballero, *Vacuum*, 2020, **175**, 109277.
- 23 M. L. Foresti, S. Milani, F. Loglio, M. Innocenti, G. Pezzatini and S. Cattarin, *Langmuir*, 2005, **21**, 6900–6907.
- 24 V. Kumar and D. K. Dwivedi, *Optik (Stuttg.)*, 2013, **124**, 2345–2348.
- 25 A. S. Khomane, *Optik (Stuttg.)*, 2013, **124**, 2432–2435.
- 26 Y. M. Azhniuk, Y. I. Hutyk, V. V. Lopushansky, M. V. Prymak, A. V. Gomonnai and D. R. T. Zahn, *J. Phys. Chem. Solids*, 2016, **99**, 66–74.
- 27 E. A. Sanchez-Ramirez, M. A. Hernandez-Perez and J. R. Aguilar-Hernandez, *Appl. Surf. Sci.*, 2015, **347**, 35–39.
- 28 F. Y. Siddiqui, S. U. Shaikh, D. J. Desale, D. S. Upadhye, S. V. Mahajan, A. V. Ghule, P. Varshney, S. H. Han and R. Sharma, *Mater. Sci. Semicond. Process.*, 2014, **27**, 404–411.
- 29 J. Xia, Y. X. Zhao, L. Wang, X. Z. Li, Y. Y. Gu, H. Q. Cheng and X. M. Meng, *Nanoscale*, 2017, **9**, 13786–13793.
- 30 S. N. Moger and M. M. G, *Mater. Sci. Semicond. Process.*, 2020, **120**, 105288.
